# Supplementary material
Source: MDPI journal article supplement (https://www.mdpi.com/2071-1050/14/13/7607)
Supplement: s1 [file s1]

## Supplementary Material

Table S1. Hypothetical land use scenarios

|                                    | Scenarios                                                                                                                                                                                                                                                                                 |                                                                                                                                                                                                                                                                                                               |                                                                                                                                                                                                                                                                                           |
|------------------------------------|-------------------------------------------------------------------------------------------------------------------------------------------------------------------------------------------------------------------------------------------------------------------------------------------|---------------------------------------------------------------------------------------------------------------------------------------------------------------------------------------------------------------------------------------------------------------------------------------------------------------|-------------------------------------------------------------------------------------------------------------------------------------------------------------------------------------------------------------------------------------------------------------------------------------------|
| Parameter                          | Economic and urban growth                                                                                                                                                                                                                                                                 | Forest conservation                                                                                                                                                                                                                                                                                           | Integrated                                                                                                                                                                                                                                                                                |
| Land use                           | 70% urban surface<br>20% agriculture (primarily monoculture)<br>10 % forest                                                                                                                                                                                                               | 30% urban surface<br>25% agriculture (primarily monoculture)<br>45% forest                                                                                                                                                                                                                                    | 50% urban surface<br>30% agriculture (primarily monoculture)<br>20% forest                                                                                                                                                                                                                |
| Land use for recommended nutrition | 70% urban surface<br>2% apple (fruit)<br>2% barley (grain)<br>2% cabbage (vegetable)<br>2% cucumber (vegetable)<br>2% fava beans (legume)<br>2% maize (vegetable)<br>2% peas (legume)<br>2% pecan nuts (nut)<br>2% spinach (leafy green)<br>2% tomatoes (vegetable)<br>10% forest & water | 30% urban surface<br>2.5% apple (fruit)<br>2.5% barley (grain)<br>2.5% cabbage (vegetable)<br>2.5% cucumber (vegetable)<br>2.5% fava beans (legume)<br>2.5% maize (vegetable)<br>2.5% peas (legume)<br>2.5% pecan nuts (nut)<br>2.5% spinach (leafy green)<br>2.5% tomatoes (vegetable)<br>45% forest & water | 50% urban surface<br>3% apple (fruit)<br>3% barley (grain)<br>3% cabbage (vegetable)<br>3% cucumber (vegetable)<br>3% fava beans (legume)<br>3% maize (vegetable)<br>3% peas (legume)<br>3% pecan nuts (nut)<br>3% spinach (leafy green)<br>3% tomatoes (vegetable)<br>20% forest & water |

Table S2. Required data and outputs generated by InVEST models\*

| InVEST model                 | Data needs                                                                                                                                                                                                                                                                                                                                                                                                                                                                                                                                                                         | Main outputs                                                                                                                                                                                                                                                                                |
|------------------------------|------------------------------------------------------------------------------------------------------------------------------------------------------------------------------------------------------------------------------------------------------------------------------------------------------------------------------------------------------------------------------------------------------------------------------------------------------------------------------------------------------------------------------------------------------------------------------------|---------------------------------------------------------------------------------------------------------------------------------------------------------------------------------------------------------------------------------------------------------------------------------------------|
| Crop production (Percentile) | <ul style="list-style-type: none"> <li>-Workspace</li> <li>-Directory to model data</li> <li>-Projected LU/LC raster (as described in section 3.2)</li> <li>-CSV table containing the name of the crop as specified by the model with the respective LU code</li> </ul>                                                                                                                                                                                                                                                                                                            | <ul style="list-style-type: none"> <li>-Total observed production.</li> <li>-Total area covered by each crop</li> <li>-Nutrient information for each crop (e.g, energy, vitamins, minerals).</li> </ul>                                                                                     |
| Sediment Delivery Ratio      | <ul style="list-style-type: none"> <li>-Workspace</li> <li>-Digital Elevation Model</li> <li>-Rainfall Erosivity Index</li> <li>-Soil erodibility</li> <li>-Projected LU/LC raster (as described in section 3.2)</li> <li>-Watershed polygon</li> <li>-CSV table containing the LU code associated to class, cover management factor, and support practice factor</li> <li>-Threshold flow accumulation (default option)</li> <li>-Borselli k parameter (default option)</li> <li>-Borselli ICO parameter (default option)</li> <li>-Maximum SDR value (default option)</li> </ul> | <ul style="list-style-type: none"> <li>-Total amount of potential soil loss in the watershed (tons / watershed).</li> <li>-Total amount of sediment exported to the stream (tons / watershed).</li> <li>-Total amount of sediment deposited on the landscape (tons / watershed).</li> </ul> |

\*based on Sharp et al (2020).

Table S3. Scenario 1: Nutrient comparison between agriculture land dominated by monocultures versus crop diversity: (a) Macronutrient production, (b) Mineral production, (c) Vitamin production

(a) Macronutrient production

| Nutrition scenario | Crop         | Energy                 | Protein              | Fat                  |
|--------------------|--------------|------------------------|----------------------|----------------------|
| Monoculture        | maize        | 213,000,000,000        | 1,316,651,950        | 662,519,134          |
| Crop diversity     | apple        | 38,386,999,481         | 45,782,660           | 29,934,816           |
|                    | barley       | 141,005,927,331        | 948,654,949          | 111,043,364          |
|                    | fava beans   | 93,893,848,083         | 1,721,057,763        | 100,812,342          |
|                    | cabbage      | 25,682,419,982         | 1,294,822,007        | 192,618,150          |
|                    | cucumber     | 12,811,826,704         | 128,118,267          | 21,681,553           |
|                    | maize        | 19,706,959,163         | 121,571,418          | 61,172,879           |
|                    | nuts (pecan) | 123,522,349,609        | 542,729,498          | 2,788,705,282        |
|                    | pea          | 59,523,834,634         | 1,025,480,800        | 48,454,490           |
|                    | spinach      | 10,695,316,461         | 315,346,444          | 43,001,788           |
|                    | tomato       | 54,415,623,587         | 638,476,650          | 145,108,330          |
|                    | <b>Total</b> | <b>579,645,105,036</b> | <b>6,782,040,456</b> | <b>3,542,532,994</b> |

(b) Mineral production

| Nutrition scenario | Crop         | Fe                   | Ca                    | Mg                    | K                      | Mn                 | Se                   | Zn                   | Lyc                      |
|--------------------|--------------|----------------------|-----------------------|-----------------------|------------------------|--------------------|----------------------|----------------------|--------------------------|
| Monoculture        | maize        | 378,782,037          | 978,403,785           | 17,751,040,089        | 40,114,555,163         | 67,789,405         | 2,166,465,523        | 308,896,052          | 0                        |
| Crop diversity     | apple        | 21,130,458           | 1,056,522,922         | 880,435,768           | 18,841,325,434         | 6,163,050          | 0                    | 7,043,486            | 0                        |
|                    | barley       | 239,317,596          | 2,776,084,109         | 7,562,436,021         | 26,803,570,708         | 126,551,145        | 3,608,909,342        | 203,898,591          | 0                        |
|                    | fava beans   | 441,465,812          | 6,786,713,230         | 12,650,960,584        | 69,975,625,729         | 107,137,822        | 540,301,442          | 206,895,918          | 0                        |
|                    | cabbage      | 599,256,466          | 50,294,739,132        | 16,051,512,489        | 263,244,804,819        | 170,146,032        | 963,090,749          | 192,618,150          | 0                        |
|                    | cucumber     | 55,189,407           | 3,153,680,420         | 2,562,365,341         | 28,974,438,855         | 15,571,297         | 59,131,508           | 39,421,005           | 0                        |
|                    | maize        | 34,974,368           | 90,339,695            | 1,639,020,179         | 3,703,927,492          | 6,259,250          | 200,037,896          | 28,521,532           | 0                        |
|                    | nuts (pecan) | 145,325,747          | 2,683,685,519         | 7,377,268,917         | 27,204,704,616         | 190,829,215        | 340,384,287          | 135,338,423          | 0                        |
|                    | pea          | 185,046,026          | 2,297,411,161         | 4,803,677,883         | 40,977,460,895         | 58,103,617         | 66,833,779           | 125,731,047          | 0                        |
|                    | spinach      | 298,807,295          | 10,915,838,450        | 8,710,618,561         | 61,525,634,899         | 98,904,112         | 110,260,994          | 58,438,327           | 0                        |
|                    | tomato       | 195,896,245          | 7,255,416,478         | 7,980,958,126         | 171,953,370,535        | 82,711,748         | 0                    | 123,342,080          | 1,866,818,659,856        |
|                    | <b>Total</b> | <b>2,216,409,420</b> | <b>87,310,431,115</b> | <b>70,219,253,869</b> | <b>713,204,863,980</b> | <b>862,377,289</b> | <b>5,888,949,998</b> | <b>1,121,248,560</b> | <b>1,866,818,659,856</b> |

(c) Vitamin production

| Nutrition scenario | Crop         | Vit A                    | Vit C                 | Vit E              | Vit K                 | Vit B1             | Vit B2             | Vit B3               | Vit B5             | Vit B6             | Folate                 |
|--------------------|--------------|--------------------------|-----------------------|--------------------|-----------------------|--------------------|--------------------|----------------------|--------------------|--------------------|------------------------|
| Monoculture        | Maize        | 29,911,201,410           | 0                     | 68,488,265         | 41,931,591            | 28,094,166         | 53,812,208         | 506,952,932          | 59,263,315         | 86,938,165         | 2,655,667,415          |
| Crop diversity     | apple        | 9,508,706,294            | 810,000,906           | 31,695,688         | 387,391,738           | 2,993,482          | 4,578,266          | 16,023,931           | 10,741,316         | 7,219,573          | 528,261,461            |
|                    | barley       | 2,105,994,841            | 0                     | 1,914,541          | 207,153               | 18,283,864         | 10,912,882         | 440,727,284          | 26,995,025         | 24,889,030         | 2,201,721,880          |
|                    | fava beans   | 3,492,192,245            | 92,246,588            | 3,294,521          | 0                     | 36,569,183         | 21,941,510         | 186,601,669          | 64,309,050         | 24,115,894         | 27,871,647,536         |
|                    | cabbage      | 134,832,704,907          | 54,575,142,462        | 0                  | 2,117,122,490         | 53,505,042         | 32,103,025         | 321,030,250          | 149,814,117        | 101,659,579        | 60,995,747,458         |
|                    | cucumber     | 20,696,027,753           | 551,894,073           | 5,913,151          | 4,444,370             | 5,321,836          | 6,504,466          | 19,316,293           | 51,050,202         | 7,884,201          | 1,379,735,184          |
|                    | maize        | 2,761,813,530            | 0                     | 6,323,779          | 1,462,429,498         | 4,968,683          | 2,594,040          | 46,808,868           | 5,472,004          | 8,027,327          | 245,207,743            |
|                    | nuts (pecan) | 5,537,206,491            | 223,084,193           | 191,440,684        | 605,681,124           | 28,433,298         | 8,305,784          | 108,739,531          | 37,299,596         | 16,917,303         | 2,757,265,595          |
|                    | pea          | 6,223,895,692            | 75,188,002            | 3,759,400          | 53,245,034,216        | 30,325,827         | 8,980,789          | 120,676,743          | 73,433,615         | 7,268,173          | 11,445,284,694         |
|                    | spinach      | 1,033,917,344,883        | 3,098,333,944         | 223,829,819        | 5,731,779,018         | 8,600,358          | 20,839,328         | 79,828,960           | 7,166,965          | 21,500,894         | 21,390,632,922         |
|                    | tomato       | 604,376,192,639          | 9,214,378,927         | 391,792,490        | 547,580               | 26,845,041         | 13,785,291         | 430,971,739          | 64,573,207         | 58,043,332         | 10,883,124,717         |
|                    | <b>Total</b> | <b>1,823,452,079,275</b> | <b>68,640,269,096</b> | <b>859,964,071</b> | <b>63,554,637,188</b> | <b>215,846,614</b> | <b>130,545,381</b> | <b>1,770,725,266</b> | <b>490,855,095</b> | <b>277,525,306</b> | <b>139,698,629,190</b> |

Table S4. Scenario 2: Nutrient comparison between agriculture land dominated by monocultures versus crop diversity: (a) Macronutrient production, (b) Mineral production, (c) Vitamin production

(a) Macronutrient production

| Nutrition scenario | Crop         | Energy                 | Protein              | Fat                  |
|--------------------|--------------|------------------------|----------------------|----------------------|
| Monoculture        | maize        | 357,808,754,874        | 2,207,307,447        | 1,110,683,365        |
| Crop diversity     | apple        | 52,208,905,904         | 62,267,502           | 40,713,367           |
|                    | barley       | 195,276,395,853        | 1,313,773,987        | 153,781,819          |
|                    | fava beans   | 120,699,684,645        | 2,212,404,044        | 129,593,346          |
|                    | cabbage      | 33,162,038,658         | 1,671,919,449        | 248,715,290          |
|                    | cucumber     | 18,118,239,773         | 181,182,398          | 30,661,637           |
|                    | maize        | 33,870,235,683         | 208,944,087          | 105,137,470          |
|                    | nuts (pecan) | 155,897,368,747        | 684,978,070          | 3,519,620,676        |
|                    | pea          | 78,236,195,008         | 1,347,858,658        | 63,687,008           |
|                    | spinach      | 12,947,087,439         | 381,738,867          | 52,055,300           |
|                    | tomato       | 71,738,049,818         | 841,726,451          | 191,301,466          |
|                    | <b>Total</b> | <b>772,154,201,529</b> | <b>8,906,793,513</b> | <b>4,535,267,378</b> |

(b) Mineral production

| Nutrition scenario | Crop         | Fe            | Ca              | Mg             | K               | Mn            | Se            | Zn            | Lyc               |
|--------------------|--------------|---------------|-----------------|----------------|-----------------|---------------|---------------|---------------|-------------------|
| Monoculture        | maize        | 635,010,953   | 1,640,249,695   | 29,758,815,893 | 67,250,237,491  | 113,645,872   | 3,631,981,467 | 517,850,261   | 0                 |
| Crop diversity     | apple        | 28,738,847    | 1,436,942,364   | 1,197,451,970  | 25,625,472,164  | 8,382,164     | 0             | 9,579,616     | 0                 |
|                    | barley       | 331,426,334   | 3,844,545,472   | 10,473,072,147 | 37,119,749,381  | 175,258,245   | 4,997,909,113 | 282,375,236   | 0                 |
|                    | fava beans   | 567,500,272   | 8,724,257,908   | 16,262,694,352 | 89,953,028,136  | 137,724,693   | 694,552,571   | 265,962,814   | 0                 |
|                    | cabbage      | 773,780,902   | 64,942,325,706  | 20,726,274,161 | 339,910,896,247 | 219,698,506   | 1,243,576,450 | 248,715,290   | 0                 |
|                    | cucumber     | 78,047,802    | 4,459,874,406   | 3,623,647,955  | 40,975,096,101  | 22,020,630    | 83,622,645    | 55,748,430    | 0                 |
|                    | maize        | 60,110,241    | 155,266,306     | 2,816,974,415  | 6,365,918,560   | 10,757,737    | 343,803,964   | 49,019,791    | 0                 |
|                    | nuts (pecan) | 183,415,403   | 3,387,075,394   | 9,310,839,831  | 34,335,016,137  | 240,845,261   | 429,598,489   | 170,810,417   | 0                 |
|                    | pea          | 243,218,487   | 3,019,642,614   | 6,313,798,194  | 53,859,443,721  | 76,369,507    | 87,844,149    | 165,256,805   | 0                 |
|                    | spinach      | 361,717,598   | 13,214,037,696  | 10,544,535,131 | 74,479,121,558  | 119,727,190   | 133,475,128   | 70,741,818    | 0                 |
|                    | tomato       | 258,256,979   | 9,565,073,309   | 10,521,580,640 | 226,692,237,426 | 109,041,836   | 0             | 162,606,246   | 2,461,093,362,439 |
|                    | Total        | 2,886,212,865 | 112,749,041,174 | 91,790,868,796 | 929,315,979,432 | 1,119,825,768 | 8,014,382,509 | 1,480,816,463 | 2,461,093,362,439 |

(c) Vitamin production

| Nutrition scenario | Crop         | Vit A             | Vit C          | Vit E         | Vit K          | Vit B1      | Vit B2      | Vit B3        | Vit B5      | Vit B6      | Folate          |
|--------------------|--------------|-------------------|----------------|---------------|----------------|-------------|-------------|---------------|-------------|-------------|-----------------|
| Monoculture        | Maize        | 50,144,776,387    | 0              | 114,817,479   | 70,296,415     | 90,213,733  | 47,098,598  | 849,883,663   | 99,352,267  | 145,747,901 | 4,452,106,315   |
| Crop diversity     | apple        | 12,932,481,279    | 1,101,655,813  | 43,108,271    | 526,878,867    | 4,071,337   | 6,226,750   | 21,793,626    | 14,608,914  | 9,819,106   | 718,471,182     |
|                    | barley       | 2,916,551,737     | 0              | 2,651,411     | 291,655,174    | 25,320,972  | 15,113,041  | 610,354,736   | 37,384,890  | 34,468,339  | 3,049,122,271   |
|                    | fava beans   | 4,489,181,253     | 118,582,146    | 4,235,077     | 762,313,798    | 47,009,351  | 28,205,611  | 239,874,742   | 82,668,696  | 31,000,761  | 35,828,748,495  |
|                    | cabbage      | 174,100,702,956   | 70,469,332,149 | 0             | 0              | 69,087,581  | 41,452,548  | 414,525,483   | 193,445,226 | 131,266,403 | 78,759,841,813  |
|                    | cucumber     | 29,267,925,787    | 780,478,021    | 8,362,265     | 4,571,371,266  | 7,526,038   | 9,198,491   | 27,316,731    | 72,194,217  | 11,149,686  | 1,951,195,052   |
|                    | maize        | 4,746,712,794     | 0              | 10,868,641    | 6,654,270      | 8,539,647   | 4,458,361   | 80,450,128    | 9,404,702   | 13,796,520  | 421,437,117     |
|                    | nuts (pecan) | 6,988,499,854     | 281,554,219    | 241,616,995   | 1,845,730,036  | 35,885,622  | 10,482,718  | 137,239,996   | 47,075,763  | 21,351,302  | 3,479,940,696   |
|                    | pea          | 8,180,486,355     | 98,824,667     | 4,941,233     | 796,087,598    | 39,859,283  | 11,804,057  | 158,613,591   | 96,518,758  | 9,553,051   | 15,043,310,479  |
|                    | spinach      | 1,251,596,277,513 | 3,750,651,104  | 270,954,510   | 64,455,139,427 | 10,411,060  | 25,226,799  | 96,635,993    | 8,675,883   | 26,027,650  | 25,894,174,879  |
|                    | tomato       | 796,770,606,650   | 12,147,643,103 | 516,513,959   | 7,556,407,914  | 35,390,771  | 18,173,639  | 568,165,355   | 85,129,152  | 76,520,586  | 14,347,609,964  |
|                    | Total        | 2,291,989,426,178 | 88,748,721,222 | 1,103,252,361 | 80,812,238,350 | 283,101,661 | 170,342,016 | 2,354,970,380 | 647,106,202 | 364,953,405 | 179,493,851,947 |

Table S5. Nutrient comparison between agriculture land dominated by monocultures versus crop diversity: (a) Macronutrient production, (b) Mineral production, (c) Vitamin production

a) Macronutrient production

| Nutrition scenario | Crop         | Energy                 | Protein               | Fat                  |
|--------------------|--------------|------------------------|-----------------------|----------------------|
| Monoculture        | maize        | 367,452,530,423        | 2,266,799,500         | 1,140,618,857        |
| Crop diversity     | apple        | 56,436,125,143         | 67,309,140            | 44,009,822           |
|                    | barley       | 228,980,105,551        | 1,540,524,675         | 180,323,776          |
|                    | fava beans   | 138,389,194,206        | 2,536,649,651         | 148,586,293          |
|                    | cabbage      | 37,973,860,874         | 1,914,515,486         | 284,803,957          |
|                    | cucumber     | 21,141,486,119         | 211,414,861           | 35,777,900           |
|                    | maize        | 33,570,610,185         | 207,095,709           | 104,207,395          |
|                    | nuts (pecan) | 180,558,837,653        | 793,335,033           | 4,076,390,919        |
|                    | pea          | 88,820,164,893         | 1,530,200,034         | 72,302,731           |
|                    | spinach      | 18,758,823,063         | 553,095,195           | 75,422,072           |
|                    | tomato       | 81,310,754,418         | 954,046,185           | 216,828,678          |
|                    | <b>Total</b> | <b>885,939,962,105</b> | <b>10,308,185,969</b> | <b>5,238,653,543</b> |

(b) Mineral production

| Nutrition scenario | Crop         | Fe          | Ca             | Mg             | K               | Mn          | Se            | Zn          | Lyc |
|--------------------|--------------|-------------|----------------|----------------|-----------------|-------------|---------------|-------------|-----|
| Monoculture        | maize        | 652,125,971 | 1,684,458,227  | 30,560,884,980 | 69,062,787,316  | 116,708,891 | 3,729,871,789 | 531,807,526 | 0   |
| Crop diversity     | apple        | 31,065,757  | 1,553,287,848  | 1,294,406,540  | 27,700,299,956  | 9,060,846   | 0             | 10,355,252  | 0   |
|                    | barley       | 388,628,828 | 4,508,094,407  | 12,280,670,970 | 43,526,428,754  | 205,506,924 | 5,860,522,729 | 331,111,762 | 0   |
|                    | fava beans   | 650,672,001 | 10,002,868,072 | 18,646,123,009 | 103,136,367,893 | 157,909,354 | 796,344,837   | 304,941,803 | 0   |
|                    | cabbage      | 886,056,754 | 74,365,477,546 | 23,733,663,047 | 389,232,073,963 | 251,576,828 | 1,424,019,783 | 284,803,957 | 0   |
|                    | cucumber     | 91,071,017  | 5,204,058,122  | 4,228,297,224  | 47,812,283,992  | 25,695,037  | 97,576,090    | 65,050,727  | 0   |
|                    | maize        | 59,578,490  | 153,892,778    | 2,792,054,678  | 6,309,603,879   | 10,662,571  | 340,762,579   | 48,586,148  | 0   |
|                    | nuts (pecan) | 212,429,961 | 3,922,878,244  | 10,783,725,414 | 39,766,486,467  | 278,944,672 | 497,556,851   | 197,830,987 | 0   |
|                    | pea          | 276,121,635 | 3,428,146,715  | 7,167,943,132  | 61,145,671,411  | 86,700,947  | 99,727,904    | 187,613,120 | 0   |
|                    | spinach      | 524,086,706 | 19,145,602,920 | 15,277,804,350 | 107,911,580,094 | 173,470,766 | 193,389,928   | 102,496,662 | 0   |

|  |              |                      |                        |                        |                          |                      |                      |                      |                          |
|--|--------------|----------------------|------------------------|------------------------|--------------------------|----------------------|----------------------|----------------------|--------------------------|
|  | tomato       | 292,718,716          | 10,841,433,922         | 11,925,577,315         | 256,941,983,962          | 123,592,347          | 0                    | 184,304,377          | 2,789,500,948,242        |
|  | <b>Total</b> | <b>3,412,429,865</b> | <b>133,125,740,574</b> | <b>108,130,265,679</b> | <b>1,083,482,780,371</b> | <b>1,323,120,292</b> | <b>9,309,900,701</b> | <b>1,717,094,795</b> | <b>2,789,500,948,242</b> |

(c) Vitamin production

| Nutrition scenario | Crop         | Vit A                    | Vit C                  | Vit E                | Vit K                  | Vit B1             | Vit B2             | Vit B3               | Vit B5             | Vit B6             | Folate                 |
|--------------------|--------------|--------------------------|------------------------|----------------------|------------------------|--------------------|--------------------|----------------------|--------------------|--------------------|------------------------|
| Monoculture        | Maize        | <b>51,496,294,375</b>    | <b>0</b>               | <b>117,912,076</b>   | <b>72,191,067</b>      | <b>92,645,202</b>  | <b>48,368,015</b>  | <b>872,789,999</b>   | <b>102,030,041</b> | <b>149,676,145</b> | <b>4,572,100,902</b>   |
| Crop diversity     | apple        | 13,979,590,632           | 1,190,854,017          | 46,598,635           | 569,538,878            | 4,400,982          | 6,730,914          | 23,558,199           | 15,791,760         | 10,614,134         | 776,643,924            |
|                    | barley       | 3,419,933,688            | 0                      | 3,109,031            | 341,993,369            | 29,691,242         | 17,721,475         | 715,698,850          | 43,837,332         | 40,417,398         | 3,575,385,219          |
|                    | fava beans   | 5,147,106,872            | 135,961,314            | 4,855,761            | 874,037,016            | 53,898,949         | 32,339,370         | 275,030,314          | 94,784,459         | 35,544,172         | 41,079,739,754         |
|                    | cabbage      | 199,362,769,591          | 80,694,454,358         | 0                    | 0                      | 79,112,210         | 47,467,326         | 474,673,261          | 221,514,188        | 150,313,199        | 90,187,919,577         |
|                    | cucumber     | 34,151,631,423           | 910,710,171            | 9,757,609            | 5,334,159,575          | 8,781,848          | 10,733,370         | 31,874,856           | 84,240,691         | 13,010,145         | 2,276,775,428          |
|                    | maize        | 4,704,722,056            | 0                      | 10,772,494           | 6,595,405              | 8,464,103          | 4,418,921          | 79,738,443           | 9,321,505          | 13,674,473         | 417,708,968            |
|                    | nuts (pecan) | 8,094,013,521            | 326,093,397            | 279,838,486          | 2,137,706,830          | 41,562,384         | 12,140,983         | 158,950,048          | 54,522,697         | 24,728,873         | 4,030,433,946          |
|                    | pea          | 9,287,161,101            | 112,193,892            | 5,609,695            | 903,784,134            | 45,251,537         | 13,400,937         | 180,071,197          | 109,576,035        | 10,845,410         | 17,078,403,636         |
|                    | spinach      | 1,813,417,359,386        | 5,434,256,990          | 392,581,555          | 93,387,996,464         | 15,084,414         | 36,550,696         | 140,014,308          | 12,570,345         | 37,711,036         | 37,517,646,126         |
|                    | tomato       | 903,091,445,739          | 13,768,621,081         | 585,437,432          | 8,564,732,799          | 40,113,306         | 20,598,724         | 643,981,175          | 96,488,762         | 86,731,471         | 16,262,150,884         |
|                    | <b>Total</b> | <b>2,994,655,734,009</b> | <b>102,573,145,220</b> | <b>1,338,560,698</b> | <b>112,120,544,470</b> | <b>326,360,975</b> | <b>202,102,716</b> | <b>2,723,590,651</b> | <b>742,647,774</b> | <b>423,590,311</b> | <b>213,202,807,462</b> |
